# Supplementary material for: Blockade of LAG-3 Immune Checkpoint Combined With Therapeutic Vaccination Restore the Function of Tissue-Resident Anti-viral CD8+ T Cells and Protect Against Recurrent Ocular Herpes Simplex Infection and Disease
Source: PubMed Central journal article supplement (PMC6304367; doi:10.3389/fimmu.2018.02922), 2018-12-17
Supplement: Image_1.pdf [file Image_1.pdf]

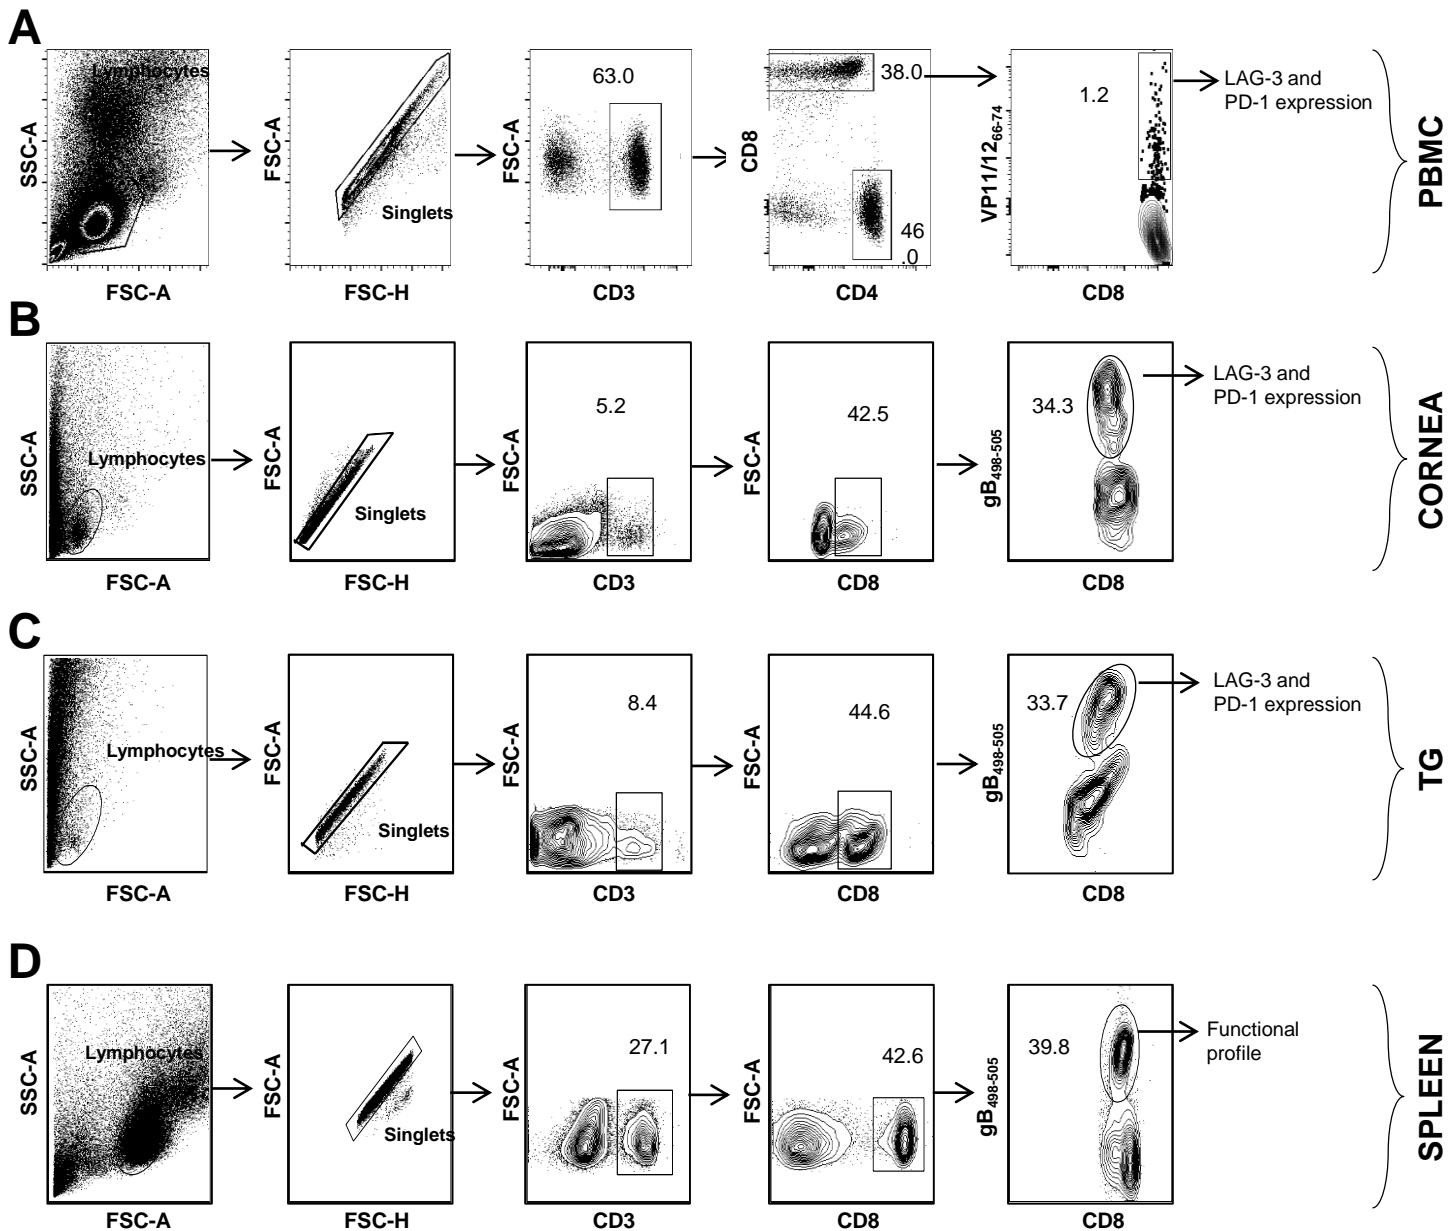

(A to D) Gating strategies. (A) Frequencies of HSV-VP11/12<sub>66-74</sub>-specific CD8<sup>+</sup> T cells in humans PBMC. (B-D) frequencies of mouse HSV-gB<sub>498-505</sub>-specific CD8<sup>+</sup> T cells in different compartments (i.e. CORNEA, TG and SPLEEN).
